# Supplementary material for: Production and Characterization of a Novel Exopolysaccharide from Ramlibacter tataouinensis
Source: MDPI journal article supplement (doi:10.3390/molecules27217172), 2022-10-24
Supplement: s1 [file s1]

# Production and characterization of a novel exopolysaccharide from *Ramlibacter tataouinensis*

Desislava Jivkova<sup>1,2#</sup>, Ganesan Sathiyarayanan<sup>1,2#</sup>, Mourad Harir<sup>3,4</sup>, Norbert Hertkorn<sup>3</sup>, Philippe Schmitt-Kopplin<sup>3,4</sup>, Ghislain Sanhaji<sup>5</sup>, Sylvain Fochesato<sup>1,2</sup>, Catherine Berthomieu<sup>6</sup>, Alain Heyraud<sup>7</sup>, Wafa Achouak<sup>1,2</sup>, Catherine Santaella<sup>1,2\*</sup>, Thierry Heulin<sup>1,2\*</sup>

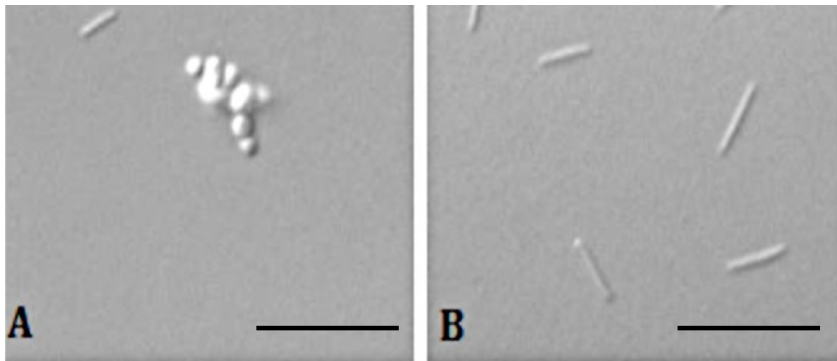

**Figure S1.** Cellular morphology of *R. tataouinensis*. (A) Cyst form of *R. tataouinensis* and (B) Rod-shaped *R. tataouinensis* when growing in TSB/10 medium at 30 °C for 3 days in the dark. These observations were carried out by bright-field optical microscopy. Scale bar represents 20 µm.

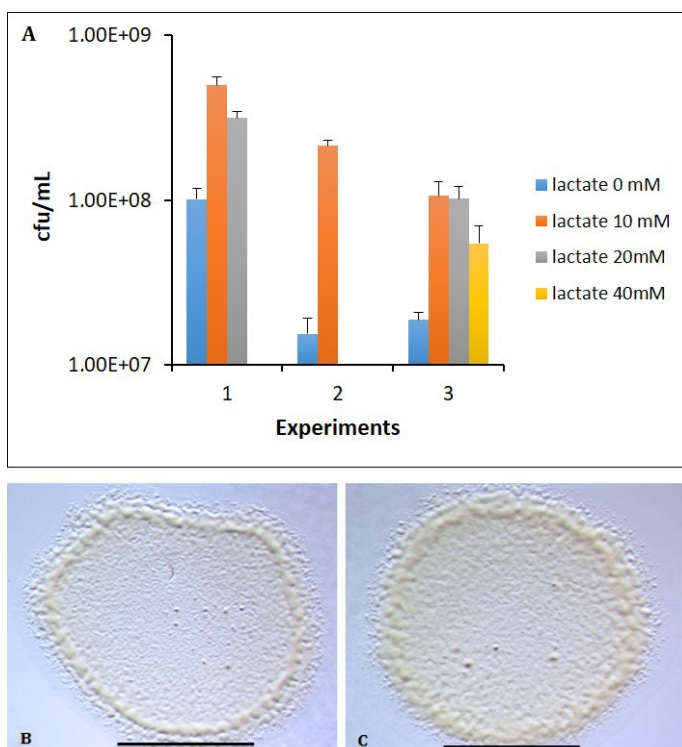

**Figure S2.** Estimation of the growth of *R. tataouinensis* in presence of lactate: (A) in TSB 1/10 medium with 10, 20- or 40-mM lactate (incubation with stirring 150 rpm, at 30 °C for 3 days) by counting cfu/mL (inoculum: 1%,  $10^5$ - $10^6$  cfu/mL). Error bars are the standard deviations of the mean. and *R. tataouinensis* colonies on TSA 1/10 with (C) or without (B) 10 mM lactate after four days on incubation under dark at 30 °C. Scale bar: 4 mm

**A**

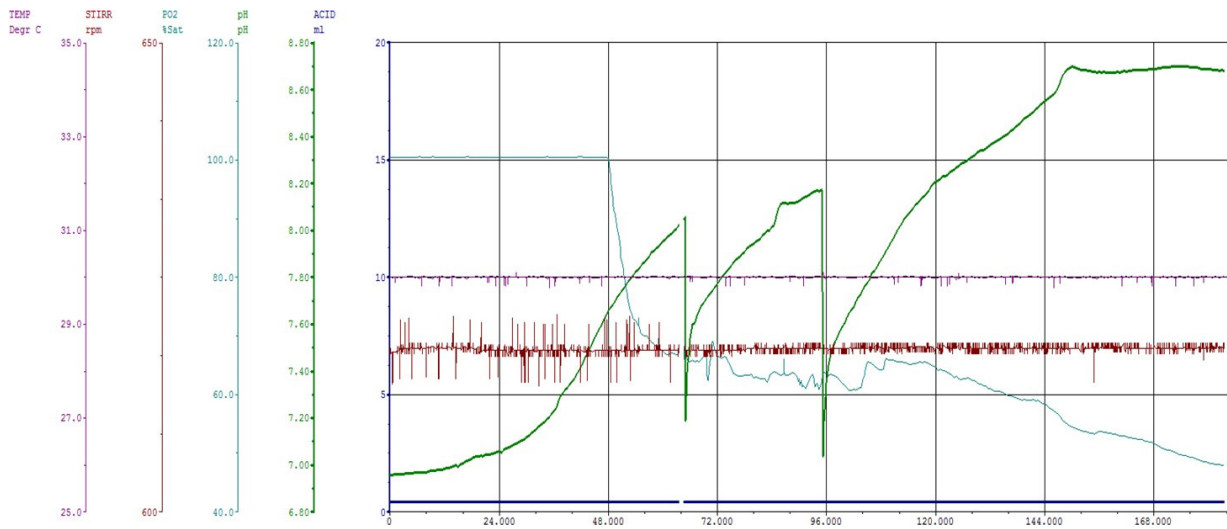

**B**

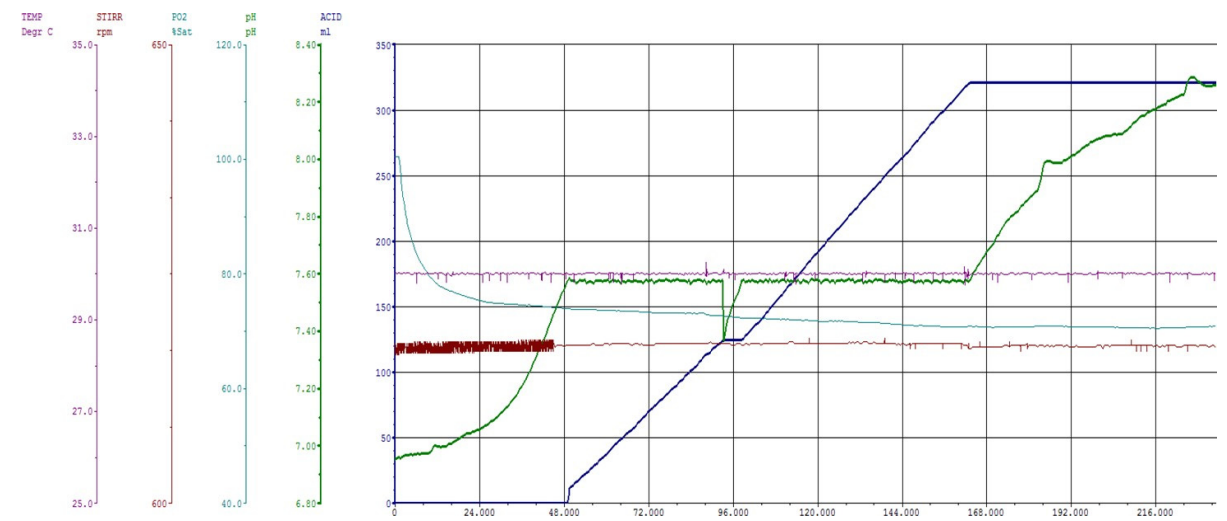

**Figure S3.** Optimization of cysts formation by fed-batch fermentation in bioreactor: The graph shows

the pH, pO<sub>2</sub> (DO), temperature and agitation curves. (A) First experiment of development of *R. tataouinensis* in TSB 1/10 culture medium supplemented with 10 mM lactate in a bioreactor. Two injections of sterile and concentrated lactic acid (80%, final concentration 2.2 mM) were made at 65 h

and 95 h of fermentation. (B) The pH was regulated by continuous lactic acid (LA) injection 10%. A TSB intake (1 g/L). The bioreactor was mainlined with sterile air supply of 0.2 vvm, agitation at 1.98 m/s and culture temperature of 30 °C.

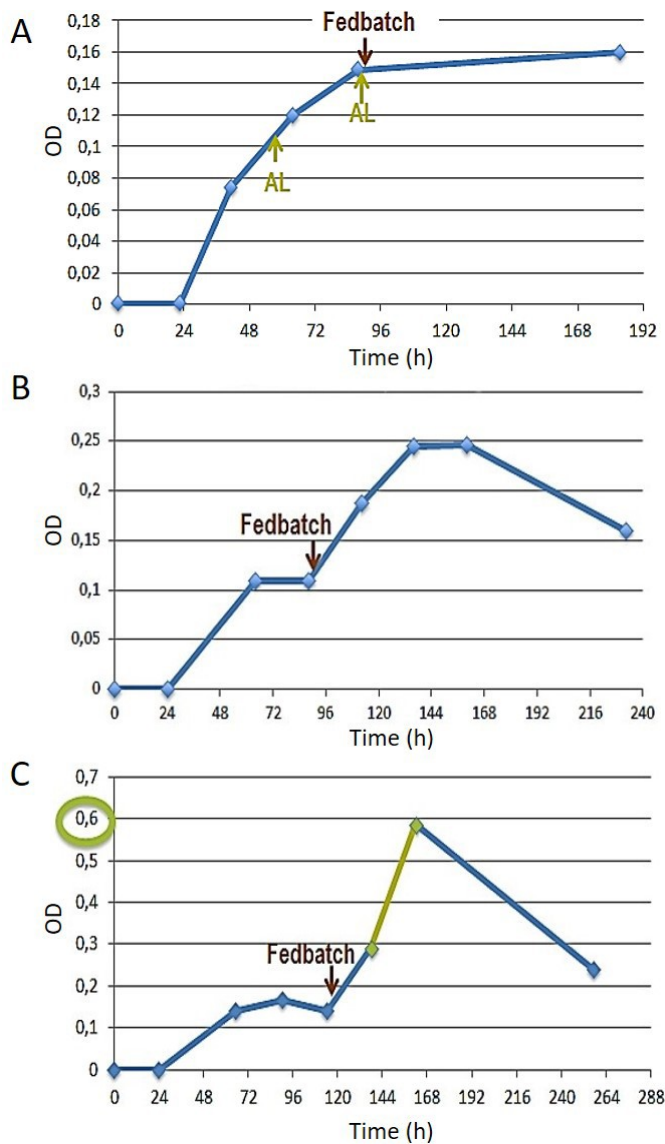

**Figure S4.** Growth (OD at 600 nm) of *R. tataouinensis* in TSB 1/10 medium supplemented with 10 mM lactate under fed-batch fermentation: (A) Experiment without pH regulation and addition of lactic acid (AL) and carbon substrate (TSB, 1 g/L) are indicated by arrows. (B) Experiment with pH regulation, in which lactic acid (10%) was introduced to regulate the pH (pH 7.6 set point) along with TSB (1 g/L) on the fourth day. (C) Experiment with optimized medium with continuous pH regulation and tryptone 3 g/L and yeast extract 1 g/L were added on the 5<sup>th</sup> day of fermentation. The overall processes were maintained with sterile air supply (0.2 vvm), agitation at 1.98 m/s, and temperature at 30 °C.

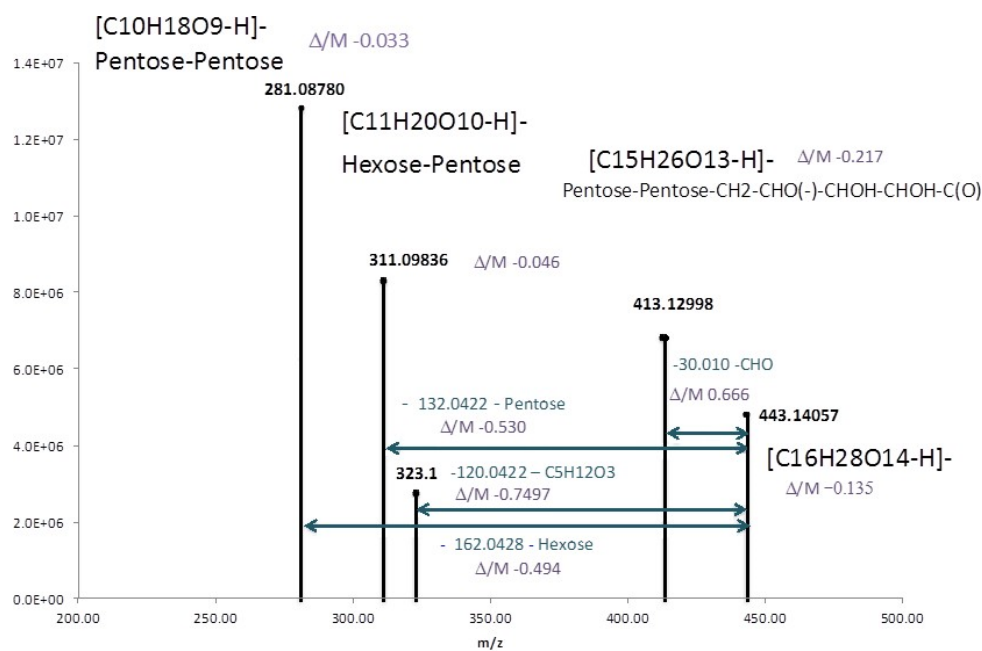

FRAGMENT 1=[C16H28O14-H]-  
pentose-pentose-hexose

**Figure S5.** Example of interpretation of m/z and mass loss between m/z for a 'pentose-pentose-hexose' oligosaccharide (mass 443.14057). The tolerance between theoretical and experimental mass for both m/z and neutral mass loss is  $\pm 0.7$  ppm.

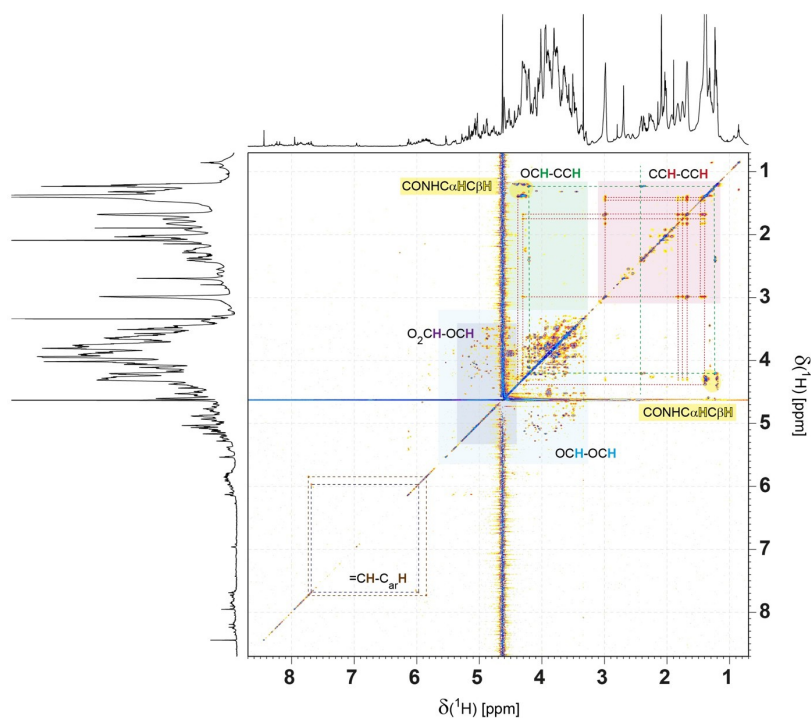

**Figure S6.**  $^1\text{H}$ ,  $^1\text{H}$  TOCSY NMR spectrum (800 MHz,  $\text{D}_2\text{O}$ , 310 K, mixing time = 70 ms) of *R. tataouinensis* EPS; (A)  $\text{CCH}\text{H}\text{--}\text{CCH}\text{H}$  cross peaks within aliphatic section, cf. Fig. S10; (B)  $\text{OCH}\text{H}\text{--}\text{CCH}\text{H}$  cross peaks, connecting aliphatic and oxygenated units; (C)  $\text{OCH}\text{H}\text{--}\text{OCH}\text{H}$  cross peaks, representing largely carbohydrates; (D)  $\text{O}_2\text{CH}\text{H}\text{--}\text{OCH}\text{H}$  cross peaks within carbohydrates (blue shaded section, cf. Fig. S8; purple shaded region, cf. Fig. S9A).

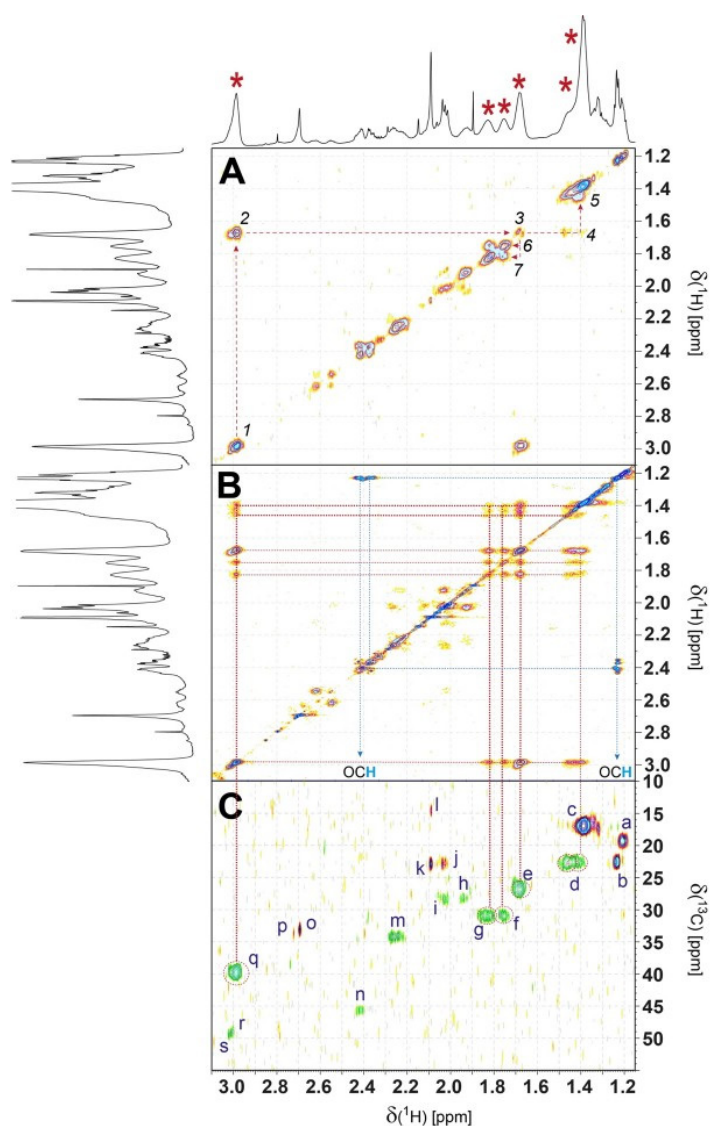

**Figure S7.** (A)  $^1\text{H}$ ,  $^1\text{H}$  COSY NMR spectrum (800 MHz,  $\text{D}_2\text{O}$ , 310 K, mixing time = 70 ms), (B)  $^1\text{H}$ ,  $^1\text{H}$  TOCSY NMR spectrum, and (C)  $\text{CH}_2$ -selective  $^1\text{H}$ ,  $^{13}\text{C}$  DEPT HSQC NMR spectrum of *R. tataouinensis* EPS: aliphatic section; green:  $\text{CH}_2$ , red:  $\text{CH}_3$  and  $\text{CH}$  units. Dotted lines denote a major contiguous, and probably a nitrogen-containing aliphatic unit. For annotation  $\delta_{\text{H/C}}$  of HSQC cross peaks, see Table S7.



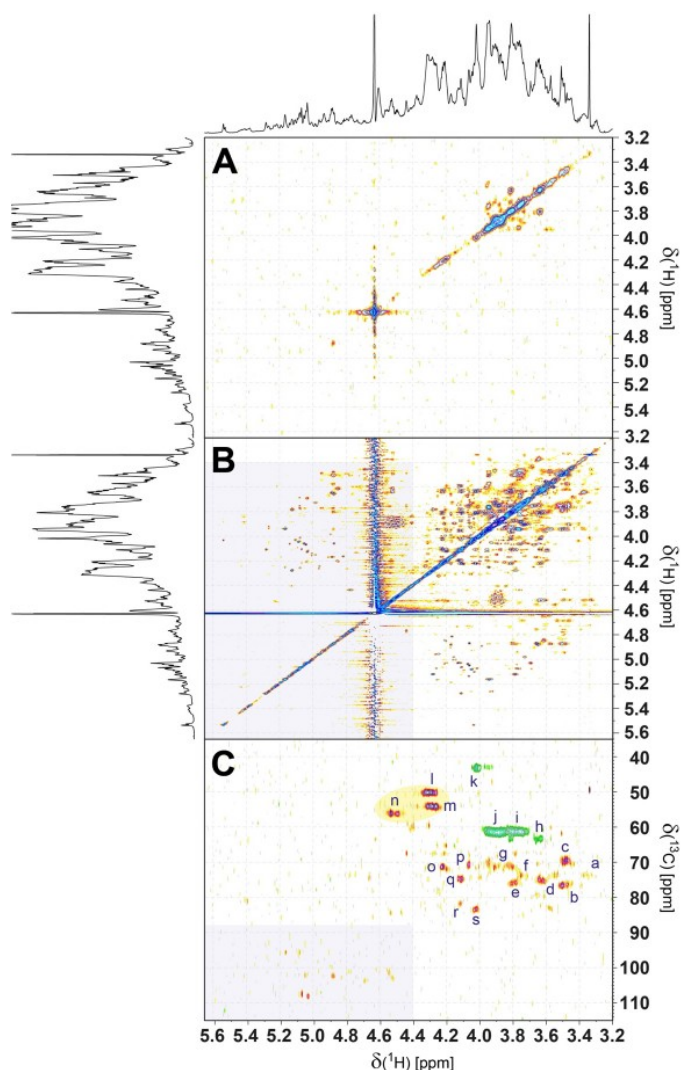

**Figure S8.** (A)  $^1\text{H}$ ,  $^1\text{H}$  COSY NMR spectrum (800 MHz,  $\text{D}_2\text{O}$ , 310 K, mixing time = 70 ms), (B)  $^1\text{H}$ ,  $^1\text{H}$  TOCSY NMR spectrum, and (C)  $\text{CH}_2$ -selective  $^1\text{H}$ ,  $^{13}\text{C}$  DEPT HSQC NMR spectrum of *R. tataouinensis* EPS: section of oxygenated aliphatic units, *i.e.* carbohydrates; green:  $\text{CH}_2$ , red:  $\text{CH}_3$  and  $\text{CH}$  units. More than 35 correlation peaks from anomeric protons confirm the presence of complex material. For annotation  $\delta_{\text{H/C}}$  of HSQC cross peaks, see Table S6; yellow shaded section probably indicates  $\text{CONH}\underline{\text{CaH}}$  cross peaks within peptide linkages.

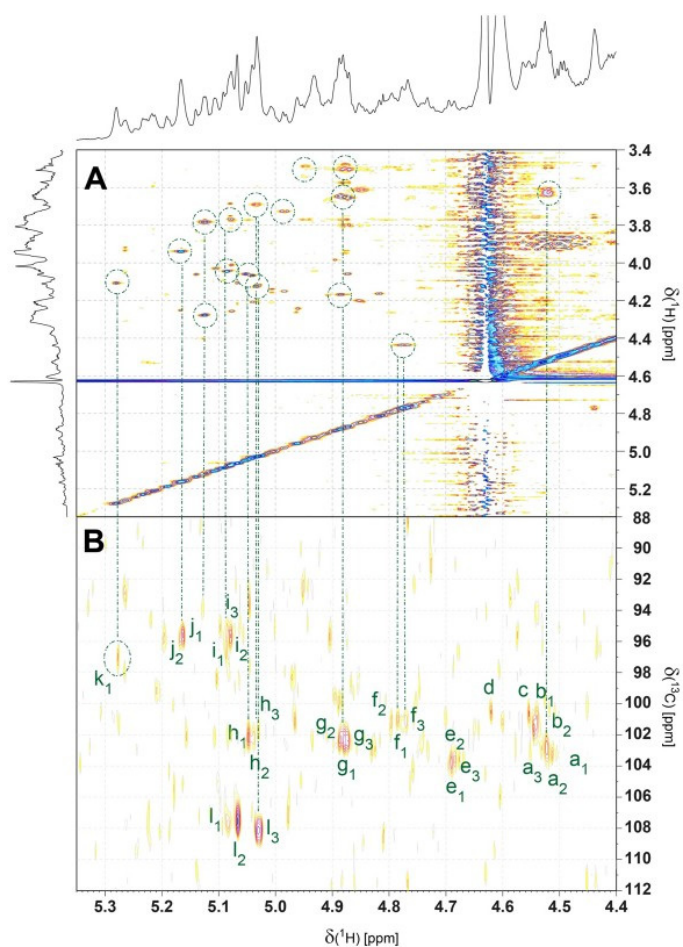

**Figure S9.** (A)  $^1\text{H}$ ,  $^1\text{H}$  TOCSY NMR spectrum, and (B)  $\text{CH}_2$ -selective  $^1\text{H}$ ,  $^{13}\text{C}$  DEPT HSQC NMR spectrum of *R. tataouinensis* EPS: section of anomeric units  $\text{O}_2\text{CH}$  within carbohydrates. The major cross peaks, and their  $\delta_{\text{H/C}}$  values are depicted in Table S7.

**Table S1.** Acquisition parameters of NMR spectra, shown according to figures. NS: number of scans (for 2D NMR: F2); AQ: acquisition time [ms]; D1: relaxation delay [ms]; NE: number of F1 increments in 2D NMR spectra; WDW1, WDW2: apodization functions in F1/ F2 (EM/GM: line broadening factor [Hz]; QS: shifted square sine bell; SI: sine bell); PR1, PR2: coefficients used for windowing functions WDW1, WDW2, EM/GM are given in [Hz], SI/QS derived functions indicate shift by  $\pi/n$ .

| spectrum                                  | Figure (expno) | NS   | AQ [ms] | D1 [ms] | NE   | WDW1 | WDW2 | PR1 | PR2 |
|-------------------------------------------|----------------|------|---------|---------|------|------|------|-----|-----|
| <sup>1</sup> H NMR                        | 1              | 4096 | 5000    | 5000    | -    | EM   | -    | 1   | -   |
| <sup>1</sup> H, <sup>1</sup> H COSY       | S7, S8         | 32   | 1078    | 422     | 512  | EM   | QS   | 3   | 2.5 |
| <sup>1</sup> H, <sup>1</sup> H TOCSY      | S6, S7, S8, S9 | 12   | 1078    | 1922    | 2048 | EM   | QS   | 2.5 | 4   |
| <sup>1</sup> H, <sup>13</sup> C DEPT HSQC | S6, S7, S8, S9 | 256  | 250     | 1250    | 215  | EM   | QS   | 2   | 2.5 |

**Table S2.** Ion characteristic of monosaccharides. For ease of reading, masses have been rounded to the unit.

| Motif or substituent | Molar Mass | [M-H]- | [M -H <sub>2</sub> O] | [M-H <sub>2</sub> O-H]- |
|----------------------|------------|--------|-----------------------|-------------------------|
| Hexose               | 180        | 179    | 162                   | 161                     |
| Uronic Acid (UA)     | 194        | 193    | 176                   | 175                     |
| Pentose              | 150        | 149    | 132                   | 131                     |
| Deoxyhexose          | 164        | 163    | 146                   | 145                     |
| Acetate              | 60         | 59     | 42                    | 41                      |

**Table S3.** Loss of mass corresponding to fragmentations of monosaccharides

| Fragmentation | Mass losses (uma) | Raw formula                                  |
|---------------|-------------------|----------------------------------------------|
| 0.1A          | 30                | CHO                                          |
| 0.2A          | 60                | C <sub>2</sub> H <sub>4</sub> O <sub>2</sub> |
| 2.4A          | 120               | C <sub>4</sub> H <sub>6</sub> O <sub>4</sub> |
| 0.4A          | 90                | C <sub>3</sub> O <sub>3</sub> H <sub>6</sub> |

**Table S4.** Use of an m/z distance matrix to search for characteristic mass losses of mono- and oligosaccharides. For ease of reading, masses were rounded to the unit. In accordance with the nitrogen rule, the mass losses sought are even. Odd mass losses have been replaced by 0's in the matrix. The yellow boxes symbolize the diagonal of the matrix. Each mass loss is illustrated by a different formatting. For example, -162 loss of a hexose, -132 loss of a pentose, -42 loss of an acetate, -18 loss of H<sub>2</sub>O.

| m/z | 801  | 785  | 783  | 783  | 719  | 571  | 443  | 439  | 427  | 425  | 423  | 413  | 407  | 405  | 395  | 377  | 359  | 339  | 337  | 323  | 311  | 309  | 307  | 293  | 291  | 291  | 281  | 275  | 263  | 175 | 161 |     |
|-----|------|------|------|------|------|------|------|------|------|------|------|------|------|------|------|------|------|------|------|------|------|------|------|------|------|------|------|------|------|-----|-----|-----|
| 801 | 0    | 0    | 0    | 18   | 0    | 0    | 0    | 362  | 0    | 0    | 378  | 0    | 394  | 396  | 406  | 424  | 442  | 0    | 464  | 478  | 490  | 492  | 494  | 508  | 510  | 510  | 520  | 526  | 538  | 626 | 640 |     |
| 785 | 0    | 0    | 0    | 2    | 0    | 0    | 0    | 346  | 0    | 0    | 362  | 0    | 378  | 380  | 390  | 408  | 426  | 0    | 448  | 462  | 474  | 476  | 478  | 492  | 494  | 494  | 504  | 510  | 522  | 610 | 624 |     |
| 783 | 0    | 0    | 0    | 0    | 0    | 212  | 0    | 344  | 0    | 358  | 360  | 370  | 376  | 378  | 388  | 406  | 424  | 444  | 446  | 460  | 472  | 474  | 476  | 490  | 492  | 492  | 502  | 508  | 520  | 608 | 622 |     |
| 783 | +18  | +2   | 0    | 0    | 0    | 0    | 0    | 0    | 0    | 0    | 0    | 0    | 0    | 0    | 0    | 0    | 0    | 0    | 0    | 0    | 0    | 0    | 476  | 0    | 0    | 0    | 0    | 0    | 0    | 608 | 622 |     |
| 719 | 0    | 0    | 0    | 0    | 0    | 148  | 276  | 280  | 292  | 294  | 296  | 306  | 312  | 314  | 324  | 342  | 360  | 380  | 382  | 396  | 408  | 410  | 412  | 426  | 428  | 428  | 438  | 444  | 456  | 544 | 558 |     |
| 571 | 0    | 0    | +212 | 0    | +148 | 0    | 0    | 132  | 0    | 146  | 148  | 158  | 164  | 166  | 176  | 194  | 212  | 232  | 234  | 248  | 260  | 262  | 264  | 278  | 280  | 280  | 290  | 296  | 308  | 396 | 410 |     |
| 443 | 0    | 0    | 0    | 0    | +276 | 0    | 0    | 4    | 0    | 18   | 20   | 30   | 36   | 38   | 48   | 66   | 84   | 104  | 106  | 120  | 132  | 134  | 136  | 150  | 152  | 152  | 162  | 168  | 180  | 268 | 282 |     |
| 439 | +362 | +346 | +344 | 0    | +280 | +132 | +4   | 0    | 0    | 0    | 0    | 0    | 0    | 34   | 0    | 62   | 80   | 0    | 102  | 116  | 128  | 0    | 132  | 146  | 148  | 148  | 158  | 164  | 176  | 264 | 278 |     |
| 427 | 0    | 0    | 0    | 0    | +292 | 0    | 0    | 0    | 0    | 0    | 2    | 4    | 14   | 20   | 22   | 32   | 50   | 68   | 88   | 90   | 104  | 116  | 118  | 120  | 134  | 136  | 136  | 146  | 152  | 164 | 252 | 266 |
| 425 | 0    | 0    | +358 | 0    | +294 | +146 | +18  | 0    | +2   | 0    | 2    | 0    | 18   | 20   | 30   | 48   | 66   | 86   | 88   | 102  | 114  | 116  | 118  | 132  | 134  | 134  | 144  | 150  | 162  | 250 | 264 |     |
| 423 | +378 | +362 | +360 | 0    | +296 | +148 | +20  | 0    | +4   | +2   | 0    | 0    | 0    | 18   | 0    | 46   | 64   | 0    | 86   | 100  | 112  | 0    | 116  | 130  | 132  | 132  | 142  | 148  | 160  | 248 | 262 |     |
| 413 | 0    | 0    | +370 | 0    | +306 | +158 | +30  | 0    | +14  | 0    | 0    | 0    | 6    | 8    | 18   | 36   | 54   | 74   | 76   | 90   | 102  | 104  | 106  | 120  | 122  | 122  | 132  | 138  | 150  | 238 | 252 |     |
| 407 | +394 | +378 | +376 | 0    | +312 | +164 | +36  | 0    | +20  | +18  | 0    | +6   | 0    | 2    | 0    | 30   | 48   | 0    | 70   | 84   | 96   | 98   | 100  | 114  | 116  | 116  | 126  | 132  | 144  | 232 | 246 |     |
| 405 | +396 | +380 | +378 | 0    | +314 | +166 | +38  | +34  | +22  | +20  | +18  | +8   | +2   | 0    | 0    | 46   | 0    | 68   | 82   | 94   | 0    | 98   | 112  | 0    | 114  | 124  | 130  | 142  | 230  | 244 |     |     |
| 395 | +406 | +390 | +388 | 0    | +324 | +176 | +48  | 0    | +32  | +30  | 0    | +18  | 0    | 0    | 0    | 18   | 36   | 0    | 58   | 72   | 84   | 86   | 88   | 102  | 104  | 104  | 114  | 120  | 132  | 220 | 234 |     |
| 377 | +424 | +408 | +406 | 0    | +342 | +194 | +66  | +62  | +50  | +48  | +46  | +36  | +30  | 0    | +18  | 0    | 18   | 0    | 40   | 54   | 66   | 0    | 70   | 84   | 86   | 86   | 96   | 102  | 114  | 202 | 216 |     |
| 359 | +442 | +426 | +424 | 0    | +360 | +212 | +84  | +80  | +68  | +66  | +64  | +54  | +48  | +46  | +36  | +18  | 0    | 0    | 22   | 36   | 48   | 0    | 52   | 66   | 0    | 68   | 78   | 84   | 96   | 184 | 198 |     |
| 339 | 0    | 0    | +444 | 0    | +380 | +232 | +104 | 0    | +88  | +86  | 0    | +74  | 0    | 0    | 0    | 0    | 0    | 0    | 2    | 16   | 28   | 30   | 32   | 46   | 48   | 48   | 58   | 64   | 76   | 164 | 178 |     |
| 337 | +464 | +448 | +446 | 0    | +382 | +234 | +106 | +102 | +90  | +88  | +86  | +76  | +70  | +68  | +58  | +40  | +22  | +2   | 0    | 0    | 0    | 0    | 30   | 0    | 0    | 46   | 0    | 62   | 74   | 162 | 176 |     |
| 323 | +478 | +462 | +460 | 0    | +396 | +248 | +120 | +116 | +104 | +102 | +100 | +90  | +84  | +82  | +72  | +54  | +36  | +16  | 0    | 0    | 12   | 0    | 16   | 30   | 0    | 32   | 42   | 48   | 60   | 148 | 162 |     |
| 311 | +490 | +474 | +472 | 0    | +408 | +260 | +132 | +128 | +116 | +114 | +112 | +102 | +96  | +94  | +84  | +66  | +48  | +28  | 0    | +12  | 0    | 0    | 4    | 18   | 0    | 20   | 30   | 36   | 48   | 136 | 150 |     |
| 309 | +492 | +476 | +474 | 0    | +410 | +262 | +134 | 0    | +118 | +116 | 0    | +104 | +98  | 0    | +86  | 0    | 0    | 0    | +30  | 0    | 0    | 0    | 0    | 2    | 16   | 18   | 18   | 28   | 34   | 46  | 134 | 148 |
| 307 | +494 | +478 | +476 | +476 | +412 | +264 | +136 | +132 | +120 | +118 | +116 | +106 | +100 | +98  | +88  | +70  | +52  | +32  | +30  | +16  | +4   | +2   | 0    | 0    | 0    | 0    | 0    | 0    | 0    | 0   | 132 | 146 |
| 293 | +508 | +492 | +490 | 0    | +426 | +278 | +150 | +146 | +134 | +132 | +130 | +120 | +114 | +112 | +102 | +84  | +66  | +46  | 0    | +30  | +18  | +16  | 0    | 0    | 0    | 2    | 0    | 18   | 30   | 118 | 132 |     |
| 291 | +510 | +494 | +492 | 0    | +428 | +280 | +152 | +148 | +136 | +134 | +132 | +122 | +116 | 0    | +104 | +86  | 0    | +48  | 0    | 0    | 0    | 0    | +18  | 0    | 0    | 0    | 10   | 16   | 28   | 116 | 130 |     |
| 291 | +510 | +494 | +492 | 0    | +428 | +280 | +152 | +148 | +136 | +134 | +132 | +122 | +116 | +114 | +104 | +86  | +68  | +48  | +46  | +32  | +20  | +18  | 0    | +2   | 0    | 0    | 0    | 0    | 0    | 116 | 130 |     |
| 281 | +520 | +504 | +502 | 0    | +438 | +290 | +162 | +158 | +146 | +144 | +142 | +132 | +126 | +124 | +114 | +96  | +78  | +58  | 0    | +42  | +30  | +28  | 0    | 0    | +10  | 0    | 0    | 6    | 18   | 106 | 120 |     |
| 275 | +526 | +510 | +508 | 0    | +444 | +296 | +168 | +164 | +152 | +150 | +148 | +138 | +132 | +130 | +120 | +102 | +84  | +64  | +62  | +48  | +36  | +34  | 0    | +18  | +16  | 0    | +6   | 0    | 0    | 100 | 114 |     |
| 263 | +538 | +522 | +520 | 0    | +456 | +308 | +180 | +176 | +164 | +162 | +160 | +150 | +144 | +142 | +132 | +114 | +96  | +76  | +74  | +60  | +48  | +46  | 0    | +30  | +28  | 0    | +18  | 0    | 0    | 88  | 102 |     |
| 175 | +626 | +610 | +608 | +608 | +544 | +396 | +268 | +264 | +252 | +250 | +248 | +238 | +232 | +230 | +220 | +202 | +184 | +164 | +162 | +148 | +136 | +134 | +132 | +118 | +116 | +116 | +106 | +100 | +88  | 0   | 0   |     |
| 161 | +640 | +624 | +622 | +622 | +558 | +410 | +282 | +278 | +266 | +264 | +262 | +252 | +246 | +244 | +234 | +216 | +198 | +178 | +176 | +162 | +150 | +148 | +146 | +132 | +130 | +130 | +120 | +114 | +102 | 0   | 0   |     |

**Table S5.** Attribution of potential structures corresponding to m/z and loss of mass between signals.  
UA symbolizes an uronic acid.

|           |                                                                                                                                                                                                                                                                                     |                                                                                               |                                                  |                                                  |                                              |
|-----------|-------------------------------------------------------------------------------------------------------------------------------------------------------------------------------------------------------------------------------------------------------------------------------------|-----------------------------------------------------------------------------------------------|--------------------------------------------------|--------------------------------------------------|----------------------------------------------|
| 439,10922 | [UA-Pentose-Pentose-H2O-H]-<br>[UA-Hexose-Hexose-C2H4O2-H2O-H]                                                                                                                                                                                                                      | [C16H26O15-H2O-H]-<br>[C18H30O17-C2H4O2-H2O-H]-                                               | 439,10933<br>439,10933                           | 439,10922<br>439,10922                           | -0,25051<br>-0,25051                         |
| 427,16099 |                                                                                                                                                                                                                                                                                     |                                                                                               |                                                  | 427,16099                                        |                                              |
| 425,12997 | [Hexose-1->6-(3,4-DiOAc)-Hexose-H] perte de masse de -102 (60+42), -132 (90+42), -144 (102+42), pertes -18, -30, -60 -90 caractéristiques enchaînement 1,6<br>[Pentose-pentose-hexose-H2O-H]-<br>[UA-6-Deoxyhexose-6-deoxyhexose-C2H4O2-H]-<br>[Hexose-Hexose-Hexose-C2H4O2-H2O-1]- | [C16H26O13-H]-<br>[C16H28O14-H2O-H]-<br>[C18H30O15-C2H4O2-H]-<br>[C18H32O16-C2H4O2-H2O-1]-    | 425,13006<br>425,13006<br>425,13006<br>425,13006 | 425,12997<br>425,12997<br>425,12997<br>425,12997 | -0,21170<br>-0,21170<br>-0,21170<br>-0,21170 |
| 423,11429 | Succinyl-Hexose-Hexose-H2O-H]-<br>Succinyl-Hexose-Pentose-C2H4O2-H]-                                                                                                                                                                                                                | [C16H26O14-H2O-H]-<br>[C16H30O16-C2H4O2-H]-                                                   | 423,11441<br>423,11441                           | 423,11429<br>423,11429                           | -0,28361<br>-0,28361                         |
| 413,12998 | [Pentose-Pentose-Pentose-H]; fragments -18, -90 -102 -132<br>[Pentose-Pentose-Hexose-C2H4O2-H]; m/z 425-18-H; m/z 443 fragmentation de l'hexose-30 (-CH2O)                                                                                                                          | [C15H26O13-H]-<br>[C17H30O15-C2H4O2-H]-                                                       | 413,13006<br>414,13006                           | 413,12998<br>413,12998                           | -0,19364<br>-0,19364                         |
| 407,11943 | [Hexose-Hexose-Di-OAc-H2O-H]-<br>[Hexose-1->6-(3,4-DiOAc)-Hexose-H2O-H]                                                                                                                                                                                                             | [C16H26O13-H2O-H]-                                                                            | 407,11950                                        | 407,11943                                        | -0,17194                                     |
| 405,10376 | m/z 423 -18                                                                                                                                                                                                                                                                         |                                                                                               |                                                  |                                                  |                                              |
| 395,11947 | [Tri-pentose-H2O-H]- ; m/z 425 0,2A ; m/z 443 fragmentation de l'hexose-60 (C2H4O2)<br>[Pentose-Hexose-Hexose-C2H4O2-H2O-H]-<br>[Succinyl-Hexose-Hexose-OMe-H]-<br>[OMe-6-Deoxyhexose-Hexose-H]-                                                                                    | [C15H26O13-H2O-H]-<br>[C17H28O14-C2H4O2-H]-<br>[C17H28O14-C2H4O2-H]-<br>[C17H28O14-C2H4O2-H]- | 395,11950<br>395,11950<br>395,11950<br>395,11950 | 395,11947<br>395,11947<br>395,11947<br>395,11947 | -0,07593<br>-0,07593<br>-0,07593<br>-0,07593 |
| 377,10891 | [Succinyl-Hexose-Hexose-OMe-C2H4O2-H]- ou [Succinyl-Hexose-OAc-pentose-C2H4O2-H]-                                                                                                                                                                                                   | [C17H28O14-C2H4O2-H2O-H]-                                                                     | 377,10891                                        | 377,10891                                        | 0,00000                                      |
| 359,09840 |                                                                                                                                                                                                                                                                                     |                                                                                               |                                                  |                                                  |                                              |
| 339,12966 | [OMethyl-6-deoxyhexose-Hexose-H]-                                                                                                                                                                                                                                                   | [C13H24O10-H]-                                                                                | 339,12967                                        | 339,12966                                        | -0,02949                                     |
| 337,07757 | m/z 439 -102 (60+42, C4H6O3) 0,2A avec acétate en position 2 de l'hexose<br>[UA-Hexose-H2O-H]-                                                                                                                                                                                      | [C12H20O12-H2O-H]-                                                                            | 337,07763                                        | 337,07757                                        | -0,17800                                     |
| 323,0984  | [Hexose-Hexose-H2O-H]-<br>[OAc-Hexose-Hexose-C2H4O2-H]-<br>m/z 443 fragmentation de l'hexose -120 (C5H12O3) et m/z 413-90 (C3H6O3)<br>[Hexose-Hexose-OAc-OAc-C4H6O3-H] 0,2A                                                                                                         | [C12H22O11-H2O-H]-<br>[C14H24O12-C2H4O2-H]-<br>[C16H26O13-C4H6O3-H]-                          | 323,09837<br>323,09837<br>323,09837              | 323,09838<br>323,09838<br>323,09838              | 0,03095<br>0,03095<br>0,03095                |
| 321,11907 | [OMethyl-6-deoxyhexose-Hexose-H2O-H]-                                                                                                                                                                                                                                               | [C13H24O10-H2O-H]-                                                                            | 321,11911                                        | 321,11907                                        | -0,12456                                     |
| 311,09836 | [Pentose-Hexose-H]- m/z 443 -pentose m/z 413-60-42                                                                                                                                                                                                                                  | [C11H20O10-H]-                                                                                | 311,09837                                        | 311,09836                                        | -0,03214                                     |
| 309,11909 | [OMethyl-6-deoxyhexose-Hexose-CH2O-H]-<br>[6-deoxyhexose-6-deoxyhexose-H]-                                                                                                                                                                                                          | [C13H24O10-CH2O-H]-<br>[C12H22O9-H]-                                                          | 309,11911<br>309,11911                           | 309,11909<br>309,11909                           | -0,06470<br>-0,06470                         |
| 307,06707 | [UA-Pentose-H2O-H]- ; [m/z 439- pentose-H2O-H]-                                                                                                                                                                                                                                     | [C11H18O11-H2O-H]-                                                                            | 307,06707                                        | 307,06707                                        | 0,00000                                      |
| 293,08778 | [Hexose-Pentose-H2O-H]- m/z 425 -Pentose ( relié à m/z 443 et m/z 323 -30: m/z 425 (-90-42)<br>[ Succinyl- OAc-Hexose- H]-                                                                                                                                                          | [C11H20O10-H2O-H]-<br>[C11H18O9-H]-                                                           | 293,08781<br>293,08781                           | 293,08778<br>293,08778                           | -0,10236<br>-0,10236                         |
| 291,10855 | [6-deoxyhexose-6-deoxyhexose-H2O-H]- ou OMethyl-6-deoxyhexose-Hexose-CH2O-H<br>[UA-Deoxypentose-H]- ; m/z 423-Pentose ; m/z 407 -deoxypentose                                                                                                                                       | [C12H22O9-H2O-H]-<br>[C11H16O9-H]-                                                            | 291,10854<br>291,07216                           | 291,10855<br>291,07217                           | 0,03435<br>0,03435                           |
| 281,08780 | [Pentose-Pentose-H]- ; m/z 443-Hexose : m/z 413-pentose : m/z 323-42 (OAc)                                                                                                                                                                                                          | [C10H18O9-H]-                                                                                 | 281,08781                                        | 281,08780                                        | -0,03558                                     |
| 275,07721 | [Succinyl-Hexose-OAc-H2O-H]-                                                                                                                                                                                                                                                        | [C11H18O9-H2O-H]-                                                                             | 275,07724                                        | 275,07721                                        | -0,10906                                     |
| 263,07723 | [Pentose-Pentose-H2O-H]- ; [m/z 425-Hexose-H]- ; m/z395- pentose : m/z 323-60                                                                                                                                                                                                       | [C10H18O9-H2O-H]-                                                                             | 263,07724                                        | 263,07723                                        | -0,03801                                     |
| 175,02486 | [UA-H2O-H]- ; m/z 439 -Pentose-Pentose ; [m/z 337-Hexose-H2O-H]- ; [m/z 423 -Pentose-deoxypentose-H]-                                                                                                                                                                               | [C6H10O7-H2O-H]-                                                                              | 175,02481                                        | 175,02486                                        | 0,28567                                      |
| 161,04560 | [Hexose-H2O-H]- ; [m/z 425-Pentose-Pentose-H]- ; m/z 323 -162                                                                                                                                                                                                                       | [C6H12O6-H2O-H]-                                                                              | 161,04555                                        | 161,04560                                        | 0,31047                                      |

**Table S6.** Summary of potential structures and number of fragments indicative of these structures

| Occurence de fragments | Motif                         |
|------------------------|-------------------------------|
| 9                      | Pentose-Pentose-Hexose        |
| 4                      | Hexose-DiOAc-Hexose           |
| 4                      | Tri-pentose                   |
| 4                      | OMe-6-Deoxyhexose-Hexose      |
| 3                      | UA-Pentose-Pentose            |
| 3                      | UA-Hexose-Hexose              |
| 3                      | Succinyl-Hexose-Hexose-OMe    |
| 3                      | UA-6Deoxyhexose-6-Deoxyhexose |
| 3                      | Hexose-Hexose-Hexose          |
| 2                      | Succinyl-Hexose-OAc           |

**Table S7.**  $^1\text{H}$  and  $^{13}\text{C}$  NMR chemical shifts  $\delta_{\text{H/C}}$  of major  $^1\text{H}$ ,  $^{13}\text{C}$  HSQC cross peaks of *R. tataouinensis* EPS (see attendant tables); asterisk denotes superimposed cross peaks at given position of  $\delta_{\text{H/C}}$ .

| Figure  | number          | $\delta_{\text{H}}$ [ppm] | $\delta_{\text{C}}$ [ppm] | $\text{CH}_n$            |
|---------|-----------------|---------------------------|---------------------------|--------------------------|
| Fig. S7 | a <sub>1</sub>  | 1.207                     | 19.42                     | C- <b>CH<sub>3</sub></b> |
| Fig. S7 | a <sub>2</sub>  | 1.120                     | 19.43                     | C- <b>CH<sub>3</sub></b> |
| Fig. S7 | a <sub>3</sub>  | 1.193                     | 19.37                     | C- <b>CH<sub>3</sub></b> |
| Fig. S7 | b <sub>1</sub>  | 1.236                     | 22.70                     | C- <b>CH<sub>3</sub></b> |
| Fig. S7 | b <sub>2</sub>  | 1.228                     | 22.64                     | C- <b>CH<sub>3</sub></b> |
| Fig. S7 | b <sub>1</sub>  | 1.244                     | 22.81                     | C- <b>CH<sub>3</sub></b> |
| Fig. S7 | c <sub>1</sub>  | 1.388                     | 17.13                     | C- <b>CH<sub>3</sub></b> |
| Fig. S7 | c <sub>2</sub>  | 1.340                     | 16.62                     | C- <b>CH<sub>3</sub></b> |
| Fig. S7 | c <sub>3</sub>  | 1.321                     | 17.46                     | C- <b>CH<sub>3</sub></b> |
| Fig. S7 | d <sub>1</sub>  | 1.461                     | 22.75                     | C- <b>CH<sub>2</sub></b> |
| Fig. S7 | d <sub>2</sub>  | 1.428                     | 22.61                     | C- <b>CH<sub>2</sub></b> |
| Fig. S7 | d <sub>3</sub>  | 1.416                     | 22.58                     | C- <b>CH<sub>2</sub></b> |
| Fig. S7 | d <sub>4</sub>  | 1.402                     | 22.75                     | C- <b>CH<sub>2</sub></b> |
| Fig. S7 | d <sub>5</sub>  | 1.387                     | 22.61                     | C- <b>CH<sub>2</sub></b> |
| Fig. S7 | e <sub>1</sub>  | 1.677                     | 26.89                     | C- <b>CH<sub>2</sub></b> |
| Fig. S7 | e <sub>2</sub>  | 1.707                     | 26.72                     | C- <b>CH<sub>2</sub></b> |
| Fig. S7 | e <sub>3</sub>  | 1.656                     | 26.59                     | C- <b>CH<sub>2</sub></b> |
| Fig. S7 | f <sub>1</sub>  | 1.760                     | 30.99                     | C- <b>CH<sub>2</sub></b> |
| Fig. S7 | f <sub>2</sub>  | 1.736                     | 30.99                     | C- <b>CH<sub>2</sub></b> |
| Fig. S7 | f <sub>3</sub>  | 1.747                     | 30.95                     | C- <b>CH<sub>2</sub></b> |
| Fig. S7 | f <sub>4</sub>  | 1.770                     | 30.82                     | C- <b>CH<sub>2</sub></b> |
| Fig. S7 | g <sub>1</sub>  | 1.842                     | 30.99                     | C- <b>CH<sub>2</sub></b> |
| Fig. S7 | g <sub>2</sub>  | 1.815                     | 30.99                     | C- <b>CH<sub>2</sub></b> |
| Fig. S7 | g <sub>3</sub>  | 1.805                     | 31.02                     | C- <b>CH<sub>2</sub></b> |
| Fig. S7 | g <sub>4</sub>  | 1.793                     | 31.02                     | C- <b>CH<sub>2</sub></b> |
| Fig. S7 | g <sub>5</sub>  | 1.856                     | 31.02                     | C- <b>CH<sub>2</sub></b> |
| Fig. S7 | g <sub>6</sub>  | 1.866                     | 30.78                     | C- <b>CH<sub>2</sub></b> |
| Fig. S7 | g <sub>7</sub>  | 1.873                     | 30.82                     | C- <b>CH<sub>2</sub></b> |
| Fig. S7 | h <sub>1</sub>  | 1.938                     | 28.31                     | C- <b>CH<sub>2</sub></b> |
| Fig. S7 | h <sub>2</sub>  | 1.925                     | 28.31                     | C- <b>CH<sub>2</sub></b> |
| Fig. S7 | h <sub>3</sub>  | 1.909                     | 27.43                     | C- <b>CH<sub>2</sub></b> |
| Fig. S7 | h <sub>4</sub>  | 1.944                     | 28.21                     | C- <b>CH<sub>2</sub></b> |
| Fig. S7 | h <sub>5</sub>  | 1.952                     | 28.52                     | C- <b>CH<sub>2</sub></b> |
| Fig. S7 | i <sub>1</sub>  | 2.029                     | 28.48                     | C- <b>CH<sub>2</sub></b> |
| Fig. S7 | i <sub>2</sub>  | 2.013                     | 28.48                     | C- <b>CH<sub>2</sub></b> |
| Fig. S7 | i <sub>3</sub>  | 2.044                     | 28.01                     | C- <b>CH<sub>2</sub></b> |
| Fig. S7 | i <sub>4</sub>  | 2.057                     | 27.68                     | C- <b>CH<sub>2</sub></b> |
| Fig. S7 | j <sub>1</sub>  | 2.037                     | 22.97                     | C- <b>CH<sub>3</sub></b> |
| Fig. S7 | j <sub>2</sub>  | 2.024                     | 22.83                     | C- <b>CH<sub>3</sub></b> |
| Fig. S7 | k               | 2.091                     | 22.96                     | C- <b>CH<sub>3</sub></b> |
| Fig. S7 | l               | 2.090                     | 14.74                     | C- <b>CH<sub>3</sub></b> |
| Fig. S7 | m <sub>1</sub>  | 2.264                     | 34.30                     | C- <b>CH<sub>2</sub></b> |
| Fig. S7 | m <sub>2</sub>  | 2.270                     | 34.32                     | C- <b>CH<sub>2</sub></b> |
| Fig. S7 | m <sub>3</sub>  | 2.275                     | 34.29                     | C- <b>CH<sub>2</sub></b> |
| Fig. S7 | m <sub>4</sub>  | 2.283                     | 34.28                     | C- <b>CH<sub>2</sub></b> |
| Fig. S7 | m <sub>5</sub>  | 2.254                     | 34.36                     | C- <b>CH<sub>2</sub></b> |
| Fig. S7 | m <sub>6</sub>  | 2.245                     | 34.19                     | C- <b>CH<sub>2</sub></b> |
| Fig. S7 | m <sub>7</sub>  | 2.238                     | 34.14                     | C- <b>CH<sub>2</sub></b> |
| Fig. S7 | m <sub>8</sub>  | 2.232                     | 34.11                     | C- <b>CH<sub>2</sub></b> |
| Fig. S7 | m <sub>9</sub>  | 2.220                     | 34.27                     | C- <b>CH<sub>2</sub></b> |
| Fig. S7 | m <sub>10</sub> | 2.209                     | 34.61                     | C- <b>CH<sub>2</sub></b> |

|         |                |           |        |                     |
|---------|----------------|-----------|--------|---------------------|
| Fig. S7 | n <sub>1</sub> | 2.406     | 45.70  | C-CH <sub>2</sub>   |
| Fig. S7 | n <sub>2</sub> | 2.421     | 45.78  | C-CH <sub>2</sub>   |
| Fig. S7 | n <sub>3</sub> | 2.431     | 45.85  | C-CH <sub>2</sub>   |
| Fig. S7 | n <sub>4</sub> | 2.438     | 45.84  | C-CH <sub>2</sub>   |
| Fig. S7 | o              | 2.695     | 33.22  | N-CH                |
| Fig. S7 | p              | 2.723     | 33.78  | N-CH                |
| Fig. S7 | q <sub>1</sub> | 2.986     | 39.80  | N-CH <sub>2</sub>   |
| Fig. S7 | q <sub>2</sub> | 3.013     | 39.69  | N-CH <sub>2</sub>   |
| Fig. S7 | r              | 3.007     | 49.12  | N-CH <sub>2</sub>   |
| Fig. S7 | s <sub>1</sub> | 3.011     | 49.26  | N-CH <sub>2</sub>   |
| Fig. S7 | s <sub>2</sub> | 3.001     | 49.06  | N-CH <sub>2</sub>   |
| Fig. S7 | s <sub>3</sub> | 3.005     | 49.13  | N-CH <sub>2</sub>   |
| Fig. S7 | s <sub>4</sub> | 2.994     | 48.72  | N-CH <sub>2</sub>   |
|         |                |           |        |                     |
| Fig. S8 | a              | 3.481     | 69.64  | O-CH                |
| Fig. S8 | b              | 3.499     | 76.82  | O-CH                |
| Fig. S8 | c              | 3.481     | 69.64  | O-CH                |
| Fig. S8 | d              | 3.628     | 75.77  | O-CH                |
| Fig. S8 | e              | 3.781     | 75.84  | O-CH                |
| Fig. S8 | f              | 3.812     | 76.25  | O-CH                |
| Fig. S8 | g              | 3.78-3.93 | 70-73  | **O-CH              |
| Fig. S8 | g <sub>1</sub> | 3.799     | 71.52  | O-CH                |
| Fig. S8 | h              | 3.648     | 63.55  | O-CH <sub>2</sub>   |
| Fig. S8 | i              | 3.758     | 61.36  | **O-CH <sub>2</sub> |
| Fig. S8 | j              | 3.897     | 61.57  | **O-CH <sub>2</sub> |
| Fig. S8 | k              | 4.018     | 43.18  | N-CH <sub>2</sub>   |
| Fig. S8 | l              | 4.303     | 50.29  | -CONH-CaH-          |
| Fig. S8 | m              | 4.283     | 54.18  | -CONH-CaH-          |
| Fig. S8 | n <sub>1</sub> | 4.532     | 56.25  | -CONH-CaH-          |
| Fig. S8 | n <sub>2</sub> | 4.495     | 56.40  | O-CH                |
| Fig. S8 | o              | 4.224     | 71.35  | O-CH                |
| Fig. S8 | p              | 4.064     | 70.86  | O-CH                |
| Fig. S8 | q              | 4.114     | 74.95  | O-CH                |
| Fig. S8 | r              | 4.115     | 81.89  | O-CH                |
| Fig. S8 | s              | 4.024     | 83.44  | O-CH                |
|         |                |           |        |                     |
| Fig. S9 | a <sub>1</sub> | 4.506     | 103.33 | O <sub>2</sub> CH   |
| Fig. S9 | a <sub>2</sub> | 4.514     | 103.35 | O <sub>2</sub> CH   |
| Fig. S9 | a <sub>3</sub> | 4.524     | 102.95 | O <sub>2</sub> CH   |
| Fig. S9 | b <sub>1</sub> | 4.555     | 100.74 | O <sub>2</sub> CH   |
| Fig. S9 | b <sub>2</sub> | 4.533     | 102.90 | O <sub>2</sub> CH   |
| Fig. S9 | c              | 4.555     | 100.73 | O <sub>2</sub> CH   |
| Fig. S9 | d              | 4.621     | 100.59 | O <sub>2</sub> CH   |
| Fig. S9 | e <sub>1</sub> | 4.691     | 103.86 | O <sub>2</sub> CH   |
| Fig. S9 | e <sub>2</sub> | 4.685     | 103.67 | O <sub>2</sub> CH   |
| Fig. S9 | e <sub>3</sub> | 4.677     | 103.65 | O <sub>2</sub> CH   |
| Fig. S9 | f <sub>1</sub> | 4.786     | 101.11 | O <sub>2</sub> CH   |
| Fig. S9 | f <sub>2</sub> | 4.797     | 101.29 | O <sub>2</sub> CH   |
| Fig. S9 | f <sub>3</sub> | 4.771     | 101.19 | O <sub>2</sub> CH   |
| Fig. S9 | g <sub>1</sub> | 4.891     | 102.42 | O <sub>2</sub> CH   |
| Fig. S9 | g <sub>2</sub> | 4.887     | 102.41 | O <sub>2</sub> CH   |
| Fig. S9 | g <sub>3</sub> | 4.874     | 102.39 | O <sub>2</sub> CH   |
| Fig. S9 | h <sub>1</sub> | 5.048     | 102.26 | O <sub>2</sub> CH   |
| Fig. S9 | h <sub>2</sub> | 5.040     | 102.31 | O <sub>2</sub> CH   |
| Fig. S9 | h <sub>3</sub> | 5.031     | 101.89 | O <sub>2</sub> CH   |
| Fig. S9 | i <sub>1</sub> | 5.088     | 96.56  | O <sub>2</sub> CH   |
| Fig. S9 | i <sub>2</sub> | 5.080     | 95.76  | O <sub>2</sub> CH   |



|         |                |       |        |                   |
|---------|----------------|-------|--------|-------------------|
| Fig. S9 | i <sub>3</sub> | 5.086 | 95.39  | O <sub>2</sub> CH |
| Fig. S9 | j <sub>1</sub> | 5.164 | 95.70  | O <sub>2</sub> CH |
| Fig. S9 | j <sub>2</sub> | 5.169 | 95.93  | O <sub>2</sub> CH |
| Fig. S9 | k <sub>1</sub> | 5.278 | 97.12  | O <sub>2</sub> CH |
| Fig. S9 | l <sub>1</sub> | 5.084 | 107.83 | O <sub>2</sub> CH |
| Fig. S9 | l <sub>2</sub> | 5.048 | 107.63 | O <sub>2</sub> CH |
| Fig. S9 | l <sub>3</sub> | 5.031 | 108.22 | O <sub>2</sub> CH |
